# Supplementary material for: Pentoxifylline in the Treatment of Cutaneous Leishmaniasis: A Randomized Clinical Trial in Colombia
Source: MDPI journal article supplement (doi:10.3390/pathogens11030378), 2022-03-21
Supplement: s1 [file s1]

Supplementary material:

**Table S1.** Therapeutic Response by Time of Follow-up.

|                                  |                                      | PTX + MA (n=34) | Placebo + MA (n=36) | <i>p</i> * |
|----------------------------------|--------------------------------------|-----------------|---------------------|------------|
|                                  |                                      | n (%)           | n (%)               |            |
| <b>End of treatment (Day 21)</b> | Apparent cure                        | 0 (0.00)        | 1 (2.78)            | 0.480      |
|                                  | Improvement                          | 33 (97.06)      | 31 (86.11)          |            |
|                                  | Therapeutic failure in Visit 2       | 0 (0.00)        | 1 (2.78)            |            |
|                                  | Did not attend the visit             | 1 (2.94)        | 3 (8.33)            |            |
| <b>Week 5 (Day 35)</b>           | Apparent cure                        | 1 (2.94)        | 6 (16.67)           | 0.124      |
|                                  | Improvement                          | 30 (88.24)      | 23 (63.89)          |            |
|                                  | Without changes                      | 1 (2.94)        | 2 (5.56)            |            |
|                                  | Therapeutic failure in another visit | 0 (0.00)        | 1 (2.78)            |            |
|                                  | Did not attend the visit             | 2 (5.88)        | 4 (11.11)           |            |
| <b>Week 7 (Day 49)</b>           | Apparent cure                        | 7 (20.59)       | 14 (38.89)          | 0.074      |
|                                  | Improvement                          | 17 (50.00)      | 18 (50.00)          |            |
|                                  | Without changes                      | 6 (17.65)       | 2 (5.56)            |            |
|                                  | Therapeutic failure in visit 4       | 0 (0.00)        | 1 (2.78)            |            |
|                                  | Therapeutic failure at another visit | 0 (0.00)        | 1 (2.78)            |            |
|                                  | Did not attend the visit             | 2 (5.88)        | 0 (0.00)            |            |
|                                  | Lost to follow up in Visit 4         | 2 (5.88)        | 0 (0.00)            |            |
| <b>Week 13 (Day 90)</b>          | Apparent cure                        | 18 (52.94)      | 20 (55.56)          | 0.580      |
|                                  | Improvement                          | 6 (17.65)       | 5 (13.89)           |            |
|                                  | Without changes                      | 0 (0.00)        | 1 (2.78)            |            |
|                                  | Therapeutic failure in Visit 5       | 7 (20.59)       | 5 (13.89)           |            |
|                                  | Therapeutic failure in another visit | 0 (0.00)        | 2 (5.56)            |            |
|                                  | Did not attend the visit             | 1 (2.94)        | 2 (5.56)            |            |
|                                  | Lost to follow up in Visit 5         | 0 (0.00)        | 1 (2.78)            |            |
|                                  | Lost to follow up in another visit   | 2 (5.88)        | 0 (0.00)            |            |
| <b>Week 26 (Day 180)</b>         | Definitive cure                      | 22(64.71)       | 27 (75.00)          | 0.690      |
|                                  | Therapeutic failure in visit 6       | 2 (5.88)        | 1 (2.78)            |            |
|                                  | Therapeutic failure in another visit | 7 (20.59)       | 7 (19.44)           |            |
|                                  | Lost to follow up in Visit 6         | 1 (2.94)        | 0 (0.00)            |            |
|                                  | Lost to follow up in another visit   | 2 (5.88)        | 1 (2.78)            |            |

\* Fisher's exact test

**Table S2.** List of 84 Genes Included in the Expression Analysis.

| Symbol        | Description                                                                    |
|---------------|--------------------------------------------------------------------------------|
| <i>bcl6</i>   | B-cell CLL/lymphoma 6                                                          |
| <i>c3</i>     | Complement component 3                                                         |
| <i>c3ar1</i>  | Complement component 3a receptor 1                                             |
| <i>ccl11*</i> | Chemokine (C-C motif) ligand 11                                                |
| <i>ccl13*</i> | Chemokine (C-C motif) ligand 13                                                |
| <i>ccl16*</i> | Chemokine (C-C motif) ligand 16                                                |
| <i>ccl17*</i> | Chemokine (C-C motif) ligand 17                                                |
| <i>ccl19*</i> | Chemokine (C-C motif) ligand 19                                                |
| <i>ccl2</i>   | Chemokine (C-C motif) ligand 2                                                 |
| <i>ccl21*</i> | Chemokine (C-C motif) ligand 21                                                |
| <i>ccl22</i>  | Chemokine (C-C motif) ligand 22                                                |
| <i>ccl23*</i> | Chemokine (C-C motif) ligand 23                                                |
| <i>ccl24</i>  | Chemokine (C-C motif) ligand 24                                                |
| <i>ccl3</i>   | Chemokine (C-C motif) ligand 3                                                 |
| <i>ccl4</i>   | Chemokine (C-C motif) ligand 4                                                 |
| <i>ccl5</i>   | Chemokine (C-C motif) ligand 5                                                 |
| <i>ccl7</i>   | Chemokine (C-C motif) ligand 7                                                 |
| <i>ccl8*</i>  | Chemokine (C-C motif) ligand 8                                                 |
| <i>ccr1</i>   | Chemokine (C-C motif) receptor 1                                               |
| <i>ccr2</i>   | Chemokine (C-C motif) receptor 2                                               |
| <i>ccr3*</i>  | Chemokine (C-C motif) receptor 3                                               |
| <i>ccr4</i>   | Chemokine (C-C motif) receptor 4                                               |
| <i>ccr7</i>   | Chemokine (C-C motif) receptor 7                                               |
| <i>cd14</i>   | CD14 molecule                                                                  |
| <i>cd40</i>   | CD40 molecule, TNF receptor superfamily member 5                               |
| <i>cd40lg</i> | CD40 ligand                                                                    |
| <i>cebpb</i>  | CCAAT/enhancer binding protein (C/EBP), beta                                   |
| <i>crp*</i>   | C-reactive protein, pentraxin-related                                          |
| <i>csf1</i>   | Colony stimulating factor 1 (macrophage)                                       |
| <i>cxcl1</i>  | Chemokine (C-X-C motif) ligand 1 (melanoma growth stimulating activity, alpha) |
| <i>cxcl10</i> | Chemokine (C-X-C motif) ligand 10                                              |
| <i>cxcl2</i>  | Chemokine (C-X-C motif) ligand 2                                               |
| <i>cxcl3</i>  | Chemokine (C-X-C motif) ligand 3                                               |
| <i>cxcl5</i>  | Chemokine (C-X-C motif) ligand 5                                               |
| <i>cxcl6*</i> | Chemokine (C-X-C motif) ligand 6 (granulocyte chemotactic protein 2)           |
| <i>cxcl9</i>  | Chemokine (C-X-C motif) ligand 9                                               |
| <i>cxcr1*</i> | Chemokine (C-X-C motif) receptor 1                                             |
| <i>cxcr2</i>  | Chemokine (C-X-C motif) receptor 2                                             |
| <i>cxcr4</i>  | Chemokine (C-X-C motif) receptor 4                                             |
| <i>faslg</i>  | Fas ligand (TNF superfamily, member 6)                                         |
| <i>fos</i>    | FBJ murine osteosarcoma viral oncogene homolog                                 |
| <i>ifng</i>   | Interferon, gamma                                                              |
| <i>il10</i>   | Interleukin 10                                                                 |
| <i>il10rb</i> | Interleukin 10 receptor, beta                                                  |
| <i>il15</i>   | Interleukin 15                                                                 |
| <i>il17a*</i> | Interleukin 17A                                                                |
| <i>il18*</i>  | Interleukin 18 (interferon-gamma-inducing factor)                              |
| <i>il1a</i>   | Interleukin 1, alpha                                                           |
| <i>il1b</i>   | Interleukin 1, beta                                                            |
| <i>il1r1</i>  | Interleukin 1 receptor, type I                                                 |
| <i>il1rap</i> | Interleukin 1 receptor accessory protein                                       |

|                 |                                                                                       |
|-----------------|---------------------------------------------------------------------------------------|
| <i>il1rn</i>    | Interleukin 1 receptor antagonist                                                     |
| <i>il22*</i>    | Interleukin 22                                                                        |
| <i>il23a</i>    | Interleukin 23, alpha subunit p19                                                     |
| <i>il23r*</i>   | Interleukin 23 receptor                                                               |
| <i>il5</i>      | Interleukin 5 (colony-stimulating factor, eosinophil)                                 |
| <i>il6</i>      | Interleukin 6 (interferon, beta 2)                                                    |
| <i>il6r</i>     | Interleukin 6 receptor                                                                |
| <i>il8</i>      | Interleukin 8                                                                         |
| <i>il9*</i>     | Interleukin 9                                                                         |
| <i>itgb2</i>    | Integrin, beta 2 (complement component 3 receptor 3 and 4 subunit)                    |
| <i>kng1*</i>    | Kininogen 1                                                                           |
| <i>lta</i>      | Lymphotoxin alpha (TNF superfamily, member 1)                                         |
| <i>ltb</i>      | Lymphotoxin beta (TNF superfamily, member 3)                                          |
| <i>ly96</i>     | Lymphocyte antigen 96                                                                 |
| <i>myd88</i>    | Myeloid differentiation primary response gene (88)                                    |
| <i>nfkb1</i>    | Nuclear factor of kappa light polypeptide gene enhancer in B-cells 1                  |
| <i>nos2*</i>    | Nitric oxide synthase 2, inducible                                                    |
| <i>nr3c1</i>    | Nuclear receptor subfamily 3, group C, member 1 (glucocorticoid receptor)             |
| <i>ptgs2</i>    | Prostaglandin-endoperoxide synthase 2 (prostaglandin G/H synthase and cyclooxygenase) |
| <i>ripk2</i>    | Receptor-interacting serine-threonine kinase 2                                        |
| <i>sele*</i>    | Selectin E                                                                            |
| <i>tirap</i>    | Toll-interleukin 1 receptor (TIR) domain containing adaptor protein                   |
| <i>tlr1</i>     | Toll-like receptor 1                                                                  |
| <i>tlr2</i>     | Toll-like receptor 2                                                                  |
| <i>tlr3</i>     | Toll-like receptor 3                                                                  |
| <i>tlr4</i>     | Toll-like receptor 4                                                                  |
| <i>tlr5</i>     | Toll-like receptor 5                                                                  |
| <i>tlr6</i>     | Toll-like receptor 6                                                                  |
| <i>tlr7</i>     | Toll-like receptor 7                                                                  |
| <i>tlr9*</i>    | Toll-like receptor 9                                                                  |
| <i>tnf</i>      | Tumor necrosis factor                                                                 |
| <i>tnfsf14*</i> | Tumor necrosis factor (ligand) superfamily, member 14                                 |
| <i>tollip</i>   | Toll interacting protein                                                              |

\* Not detected

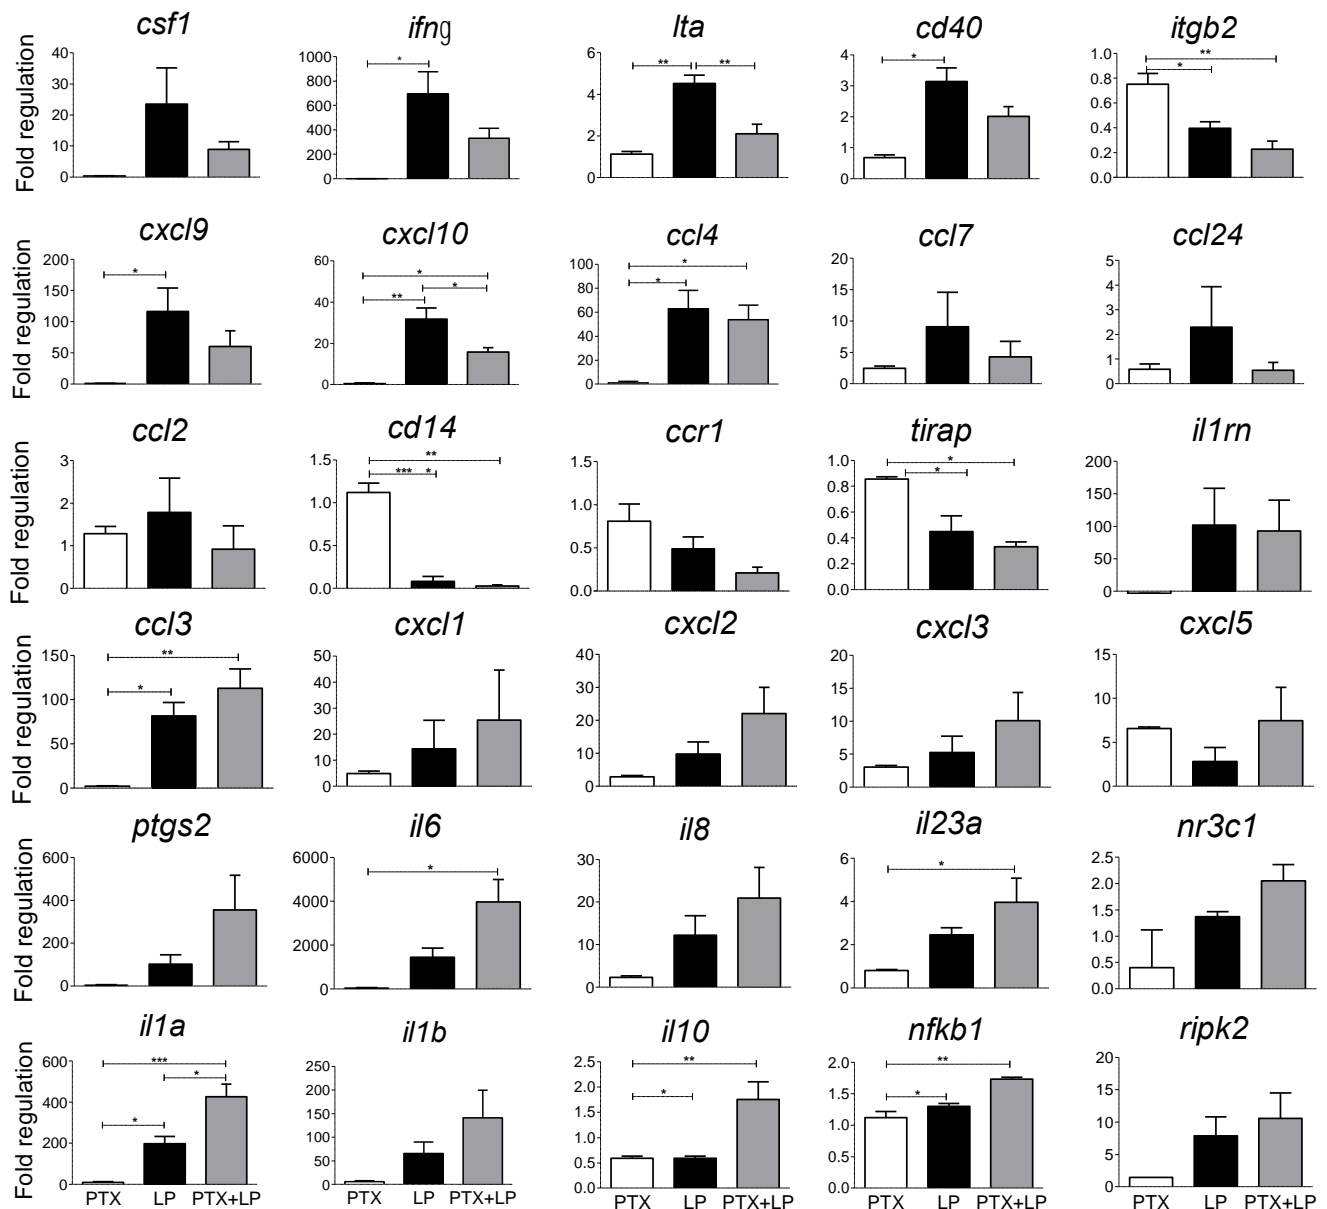

**Figure S1.** Modulation of gene expression by pentoxifylline during *ex vivo* infection with *L. (V.) panamensis*. PBMCs obtained before treatment from patients with active CL (n = 3) were exposed to 200 μM of PTX, *L. (V.) panamensis* (LP), or Lp+200 μM of PTX (PTX+LP). The genes presented correspond to those that were significantly modulated or showed a notable but not statistically significant modulation. Data are presented as the mean ± SEM of fold regulation compared with PBMCs without *ex vivo* treatment. One-way ANOVA test was used to establish statistical differences among groups and Tukey's multiple comparison test was performed on subsets of data. \* $p < 0.05$ , \*\* $p < 0.01$ .

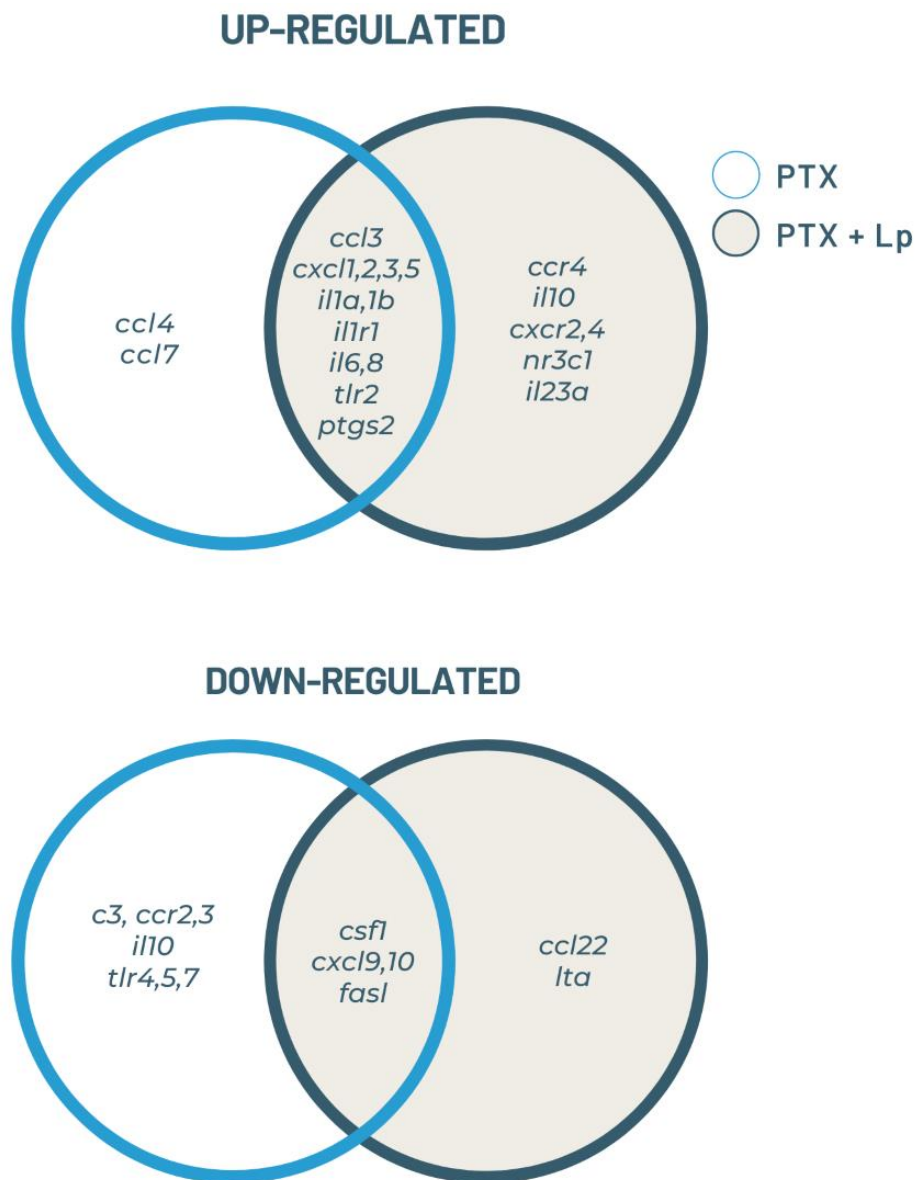

**Figure S2.** Schematic representation of immune mediators modulated by PTX in both uninfected or infected PBMCs obtained before treatment from patients with CL. Genes upregulated (A) or downregulated (B) compared with PBMCs not exposed to PTX.
